# Supplementary material for: The application of large language models in medicine: A scoping review
Source: PubMed Central journal article supplement — iScience. 2024 Apr 23;27(5):109713. doi: 10.1016/j.isci.2024.109713 (PMC11091685; doi:10.1016/j.isci.2024.109713), 2024-04-23

## **Supplemental information**

### **The application of large language models in medicine: A scoping review**

**Xiangbin Meng, Xiangyu Yan, Kuo Zhang, Da Liu, Xiaojuan Cui, Yaodong Yang, Muhan Zhang, Chunxia Cao, Jingjia Wang, Xuliang Wang, Jun Gao, Yuan-Geng-Shuo Wang, Jia-ming Ji, Zifeng Qiu, Muzi Li, Cheng Qian, Tianze Guo, Shuangquan Ma, Zeying Wang, Zexuan Guo, Youlan Lei, Chunli Shao, Wenyao Wang, Haojun Fan, and Yi-Da Tang**

- ✓ Good performance in medical exams.
- ✓ Realistic training scenarios.
- ✓ Synergy for AI and humanistic qualities
- .....

- ✓ Blend clinical details with algorithmic accuracy.
- ✓ Complement for doctors, rather than replacement
- .....

- ✓ Redefine the role of dental nurses.
- ✓ Postoperative care .
- ✓ Assisting children with Down syndrome.
- .....

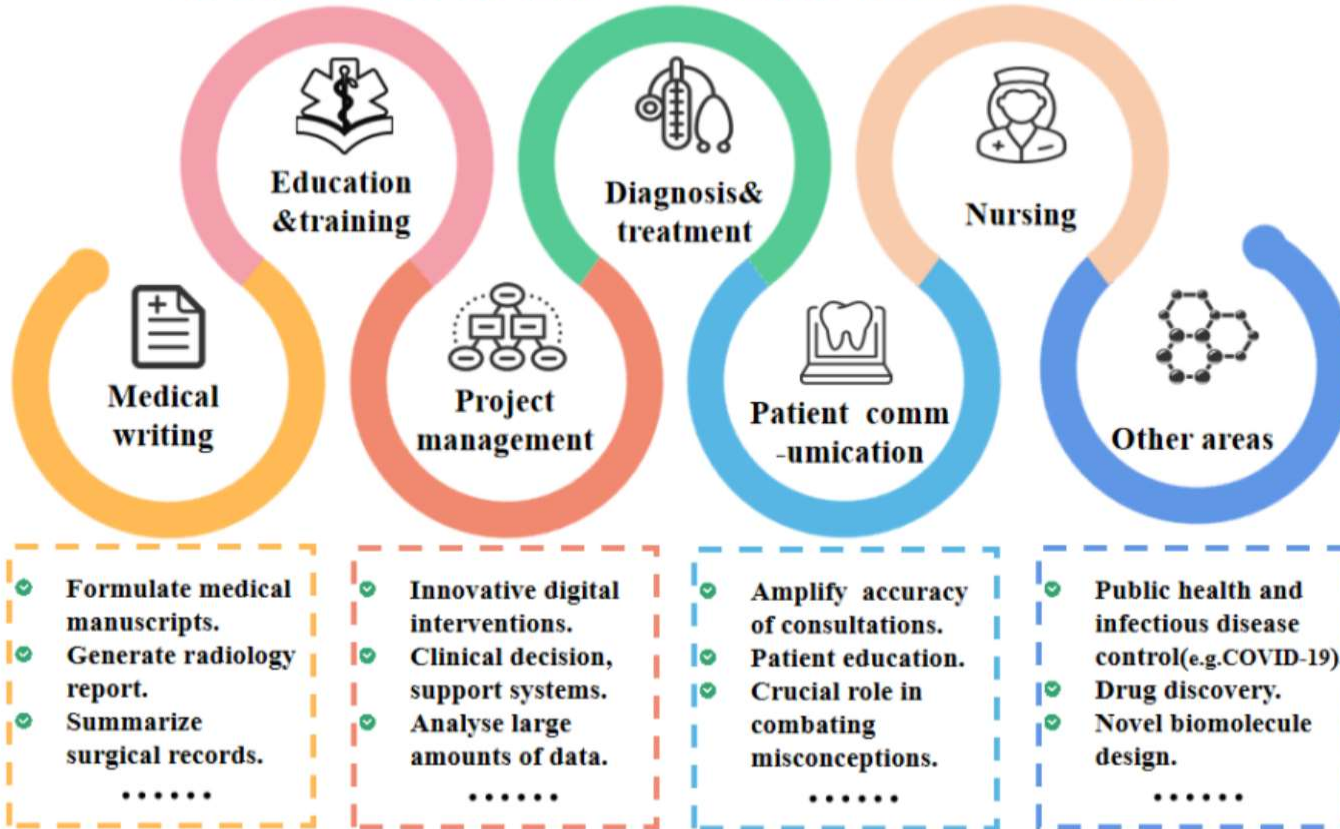

Supplement: mmc1.pdf [file mmc1.pdf]
